# Supplementary material
Source: publisher site journal article supplement (https://iopscience.iop.org/0953-4075/53/3/034001/media/B_ab6051_supp_data.pdf)
Supplement: Supplementary file 1 [file B_ab6051_supp_data.pdf]

ShieldSquare Error


# Something went wrong

An error has prevented the portal from working properly.

Please contact us.

You reached this page when trying to access
**MDI3MDQ5ZTAzYjcxLTcyNDgtZjNlNC03NDRiLWRhYzdkOTUy** from
**3.131.13.194** on
**April 26 2024, 03:46:19 UTC**
